# Supplementary material for: Long-term Exposure to PM10 Increases Lung Cancer Risks: A Cohort Analysis
Source: PubMed Central journal article supplement — Cancer Res Treat. 2022 Jan 17;54(4):1030–7. doi: 10.4143/crt.2021.1030 (PMC9582463; doi:10.4143/crt.2021.1030), 2022-01-17
Supplement: crt-2021-1030_S1-Table.pdf [file crt-2021-1030_S1-Table.pdf]

**S1 Table.** Sociodemographic characteristics of the included patients according to newly diagnosis of lung cancer

|                            | Patients without newly diagnosed lung cancer<br>(n=5,794,814) | Patients with newly diagnosed lung cancer<br>(n=36,225) |
|----------------------------|---------------------------------------------------------------|---------------------------------------------------------|
| Age (yr)                   |                                                               |                                                         |
| ≥ 20 and < 30              | 1,027,834 (17.7)                                              | 524 (1.4)                                               |
| ≥ 30 and < 40              | 1,409,288 (24.3)                                              | 2,035 (5.6)                                             |
| ≥ 40 and < 50              | 1,702,322 (29.4)                                              | 7,694 (21.2)                                            |
| ≥ 50 and < 60              | 1,188,703 (20.5)                                              | 14,678 (40.5)                                           |
| ≥ 60 and < 65              | 466,667 (8.1)                                                 | 11,294 (31.2)                                           |
| Female sex                 | 2,611,116 (45.1)                                              | 11,798 (32.6)                                           |
| BMI, median (IQR)          | 23.4 (21.3-25.5)                                              | 23.7 (21.7-25.6)                                        |
| Screening year             |                                                               |                                                         |
| 2005                       | 1,593,369 (27.5)                                              | 15,560 (43.0)                                           |
| 2006                       | 2,695,761 (46.5)                                              | 13,865 (38.3)                                           |
| 2007                       | 1,505,684 (26.0)                                              | 6,800 (18.8)                                            |
| Smoking history            |                                                               |                                                         |
| Never-smoker               | 3,534,972 (61)                                                | 18,861 (52.1)                                           |
| Ex-smoker                  | 508,447 (8.8)                                                 | 4,087 (11.3)                                            |
| Current smoker             | 1,465,374 (25.3)                                              | 12,076 (33.3)                                           |
| Not recorded               | 286,021 (4.9)                                                 | 1,201 (3.3)                                             |
| Socioeconomic status       |                                                               |                                                         |
| 1st (1-5 quantile)         | 1,124,276 (19.4)                                              | 7,569 (20.9)                                            |
| 2nd (6-10 quantile)        | 1,350,721 (23.3)                                              | 7,018 (19.4)                                            |
| 3rd (11-15 quantile)       | 1,574,822 (27.2)                                              | 8,965 (24.7)                                            |
| 4th (16-20 quantile)       | 1,642,879 (28.4)                                              | 12,283 (33.9)                                           |
| Not recorded               | 102,116 (1.8)                                                 | 390 (1.1)                                               |
| Drinking behavior          |                                                               |                                                         |
| < 3/wk                     | 5,078,138 (87.6)                                              | 30,065 (83.0)                                           |
| ≥ 3/wk                     | 485,761 (8.4)                                                 | 5,219 (14.4)                                            |
| Not recorded               | 230,915 (4.0)                                                 | 941 (2.6)                                               |
| Exercise behavior          |                                                               |                                                         |
| < 3/wk                     | 4,512,066 (77.9)                                              | 27,254 (75.3)                                           |
| ≥ 3/wk                     | 1,005,619 (17.4)                                              | 7,871 (21.7)                                            |
| Not recorded               | 277,129 (4.7)                                                 | 1,100 (3.0)                                             |
| Underlying chronic disease |                                                               |                                                         |
| Hypertension               | 385,638 (6.7)                                                 | 4,965 (13.7)                                            |
| Previous malignancy        | 23,314 (0.4)                                                  | 891 (2.5)                                               |
| Cardiovascular disease     | 35,272 (0.6)                                                  | 536 (1.5)                                               |

|                                                           |                  |                  |
|-----------------------------------------------------------|------------------|------------------|
| Diabetes mellitus                                         | 128,257 (2.2)    | 2,064 (5.7)      |
| Stroke                                                    | 16,784 (0.3)     | 280 (0.8)        |
| Liver disease                                             | 77,055 (1.3)     | 712 (2)          |
| <b>Blood chemistry, median (IQR)</b>                      |                  |                  |
| Hemoglobin (g/dL)                                         | 14.1 (13.0-15.3) | 14.3 (13.2-15.2) |
| Fasting glucose (mg/dL)                                   | 90 (83-99)       | 94 (85-105)      |
| Total cholesterol (mg/dL)                                 | 190 (167-215)    | 195 (171-220)    |
| <b>Chest radiography</b>                                  |                  |                  |
| Normal                                                    | 5,164,345 (89.1) | 25,624 (70.7)    |
| Suspicious active pulmonary tuberculosis                  | 293,075 (5.1)    | 4,085 (11.3)     |
| Suspicious inactive pulmonary tuberculosis                | 23,486 (0.4)     | 615 (1.7)        |
| Suspicious lung disease other than pulmonary tuberculosis | 108,918 (1.9)    | 3,139 (8.7)      |
| Suspicious cardiovascular disease                         | 82,845 (1.4)     | 758 (2.1)        |
| Not recorded                                              | 122,145 (2.1)    | 2,004 (5.5)      |

---

Values are presented as number (%) or median (range). BMI, body mass index; IQR, interquartile range.
